# Supplementary material for: Beyond Platinum, ICIs in Metastatic Cervical Cancer: A Systematic Review
Source: MDPI journal article supplement (doi:10.3390/cancers14235955), 2022-12-01
Supplement: s1 [file s1]

**“Beyond platinum: ICIs in metastatic cervical cancer. A systematic review.”**

**SUPPLEMENTARY MATERIAL**

**Table S1.** PICOS structure for study selection.

|                      |                                                                                           |
|----------------------|-------------------------------------------------------------------------------------------|
| <u>P</u> atients     | Adult women with cervical cancer in the recurrent/metastatic setting                      |
| <u>I</u> ntervention | Immune checkpoint inhibitors (ICIs)                                                       |
| <u>C</u> omparison   | Not ICIs                                                                                  |
| <u>O</u> utcome(s)   | Response rates (ORR, DCR), survival outcomes (PFS, OS), adverse events (number and grade) |
| <u>S</u> tudy Design | Prospective clinical trials                                                               |

|                                             | Confounding bias | Selection bias | Classification intervention bias | Deviation from intended intervention | Missing data bias | Measure outcome bias | Selected outcome bias | Overall bias |
|---------------------------------------------|------------------|----------------|----------------------------------|--------------------------------------|-------------------|----------------------|-----------------------|--------------|
| Frenel et al (NCT02054806) <sup>24</sup>    | +                | +              | +                                | +                                    | +                 | ?                    | +                     | +            |
| Youn et al (NCT03444376) <sup>25</sup>      | +                | +              | ?                                | +                                    | +                 | ?                    | +                     | ?            |
| Chung et al (NCT02628067) <sup>26</sup>     | +                | +              | +                                | +                                    | +                 | +                    | +                     | +            |
| Colombo et al (NCT03635567) <sup>27</sup>   | +                | +              | +                                | +                                    | +                 | +                    | +                     | +            |
| Santin et al (NCT02257528) <sup>28</sup>    | +                | +              | +                                | ?                                    | ?                 | +                    | +                     | ?            |
| Naumann et al (NCT02488759) <sup>29</sup>   | +                | +              | +                                | ?                                    | ?                 | +                    | +                     | ?            |
| Oaknin et al (NCT02488759) <sup>30</sup>    | +                | +              | +                                | ?                                    | ?                 | +                    | +                     | ?            |
| Tamura et al (JapicCTI163212) <sup>31</sup> | +                | +              | +                                | +                                    | +                 | ?                    | +                     | +            |
| O'Malley et al (NCT03104699) <sup>32</sup>  | +                | +              | +                                | +                                    | +                 | ?                    | +                     | +            |
| O'Malley et al (NCT03495882) <sup>33</sup>  | +                | +              | +                                | +                                    | +                 | ?                    | +                     | +            |
| Tewari et al (NCT03257267) <sup>34</sup>    | +                | +              | +                                | +                                    | +                 | +                    | +                     | +            |
| Rischin et al (NCT02760498) <sup>35</sup>   | +                | +              | +                                | +                                    | +                 | ?                    | +                     | +            |
| Lan et al (NCT03816553) <sup>36</sup>       | +                | +              | +                                | +                                    | +                 | ?                    | +                     | +            |
| Zhang et al <sup>37</sup>                   | +                | +              | +                                | +                                    | +                 | +                    | +                     | +            |
| Zheng et al <sup>38</sup>                   | +                | +              | +                                | +                                    | ?                 | +                    | +                     | +            |
| Friedman et al (NCT02921269) <sup>39</sup>  | +                | +              | +                                | +                                    | +                 | ?                    | +                     | +            |
| Tabernero et al (NCT02458638) <sup>40</sup> | +                | +              | +                                | +                                    | +                 | +                    | +                     | +            |
| Lheureux et al (NCT01693783) <sup>41</sup>  | +                | +              | +                                | ?                                    | ?                 | +                    | +                     | ?            |

**Figure S1.** ROBINS-I tool for risk of bias.
